# Supplementary material
Source: publisher figshare collection journal article supplement (https://gsajournals.figshare.com/articles/dataset/_/10010408)
Supplement: Supplementary file 1 [file 2]

## Sheet: Sheet1
Table S1. RNAi screen, summary of results. 309 RNAi constructs targeting 237 genes were examined through TLI. Knockdown of 68 genes changed rhabdomere pattern or light transmission, categorized as Class I, Class II, or Class III defects and were subsequently immunostained with Crb, Eys, and Rh1. Green indicates no effect, red indicates a deviation from wild type, and black indicates lethality. Th…
				TLI		Immunostaining
Gene name	CG#	RNAi genotype	RNAi source			Crb	Eys	Rh1	Notes
alphaCOP	CG7961	y[1] v[1]; P{y[+t7.7] v[+t1.8]=TRiP.HM04008}attP2	BDSC: 31702
alphaCOP	CG7961	y[1] sc[*] v[1]; P{y[+t7.7] v[+t1.8]=TRiP.HMS01272}attP2/TM3, Sb[1]	BDSC: 34923
alphaSnap	CG6625	y[1] sc[*] v[1]; P{y[+t7.7] v[+t1.8]=TRiP.HMS00872}attP2	BDSC: 34088
alphaSnap	CG6625	y[1] v[1]; P{y[+t7.7] v[+t1.8]=TRiP.JF03266}attP2	BDSC: 29587
Ama	CG2198	w[1118] P{GD12733}v22944	VDRC: 22944
Amph	CG8604	y[1] v[1]; P{y[+t7.7] v[+t1.8]=TRiP.JF02883}attP2	BDSC: 28048
AP-1 sigma	CG5864	y[1] sc[*] v[1]; P{y[+t7.7] v[+t1.8]=TRiP.HMS02143}attP2	BDSC: 40895
AP-1 sigma	CG5864	P{KK108601}VIE-260B	VDRC: 101356
AP-1-2beta, Bap	CG12532	y[1] v[1]; P{y[+t7.7] v[+t1.8]=TRiP.JF02963}attP2	BDSC: 28328	Class I					Irregular/broken rhabdomeres
AP-1-2beta, Bap	CG12532	y[1] v[1]; P{y[+t7.7] v[+t1.8]=TRiP.HM04014}attP2	BDSC: 31707
AP-1-2beta, Bap	CG12532	w[1118]; P{GD1204}v7721/TM3	VDRC: 7721	Class I					Missing/irregular rhabdomeres
AP-1gamma	CG9113	y[1] v[1]; P{y[+t7.7] v[+t1.8]=TRiP.JF02684}attP2	BDSC: 27533
AP-1gamma	CG9113	w[1118]; P{GD1711}v3275/TM3	VDRC: 3275
AP-1mu/AP-47	CG9388	y[1] v[1]; P{y[+t7.7] v[+t1.8]=TRiP.JF02685}attP2	BDSC: 27534	Class I
AP-2alpha	CG4260	y[1] sc[*] v[1]; P{y[+t7.7] v[+t1.8]=TRiP.HMS00653}attP2	BDSC: 32866	Class I					Irregular/broken rhabdomeres
AP-2mu/AP-50	CG7057	y[1] v[1]; P{y[+t7.7] v[+t1.8]=TRiP.JF02875}attP2/TM3, Sb[1]	BDSC: 28040	Class I					Minor rhabdomeral defects
AP-2sigma	CG6056	y[1] v[1]; P{y[+t7.7] v[+t1.8]=TRiP.JF02631}attP2	BDSC: 27322
Arf102F/arf4	CG11027	y[1] v[1]; P{y[+t7.7] v[+t1.8]=TRiP.JF02581}attP2	BDSC: 27268
Arf51F/Arf6	CG8156	y[1] v[1]; P{y[+t7.7] v[+t1.8]=TRiP.JF02549}attP2	BDSC: 27261
Arf79F	CG8385	y[1] v[1]; P{y[+t7.7] v[+t1.8]=TRiP.JF01809}attP2	BDSC: 29538
Arl1/ Arf72A	CG6025	y[1] v[1]; P{y[+t7.7] v[+t1.8]=TRiP.JF02378}attP2/TM3, Sb[1]	BDSC: 27052
aux	CG1107	y[1] sc[*] v[1]; P{y[+t7.7] v[+t1.8]=TRiP.GL00213}attP2	BDSC: 35310	Class I					Reduced Crb, cytoplasmic Eys and Rh1
aux	CG1107	y[1] v[1]; P{y[+t7.7] v[+t1.8]=TRiP.HMS01935}attP40	BDSC: 39017	Class I					Reduced Crb, cytoplasmic Eys and Rh1
aux	CG1107	y[1] v[1]; P{y[+t7.7] v[+t1.8]=TRiP.JF03129}attP2	BDSC: 28509
bam	CG10422	y[1] v[1]; P{y[+t7.7] v[+t1.8]=TRiP.HMS00029}attP2	BDSC: 33631
Bet1	CG14084	y[1] v[1]; P{y[+t7.7] v[+t1.8]=TRiP.HMS02324}attP40	BDSC: 41927	Class I
Bet3	CG3911	y[1] sc[*] v[1]; P{y[+t7.7] v[+t1.8]=TRiP.HMS01764}attP40	BDSC: 38302	Class I					Cytoplasmic Rh1
Bet3	CG3911	w1118; P{GD11163}v21738	VDRC: 21738	Class I					Cytoplasmic Rh1
Bet5	CG1359	y[1] v[1]; P{y[+t7.7] v[+t1.8]=TRiP.HMS01909}attP40	BDSC: 38993
beta'Cop	CG6699	y[1] sc[*] v[1]; P{y[+t7.7] v[+t1.8]=TRiP.HMS01038}attP2/TM3, Sb[1]	BDSC: 36113
beta'Cop	CG6699	y[1] v[1]; P{y[+t7.7] v[+t1.8]=TRiP.HM04017}attP2/TM3, Sb[1]	BDSC: 31710
betaCop	CG6223	y[1] v[1]; P{y[+t7.7] v[+t1.8]=TRiP.HM04016}attP2	BDSC: 31709
betaCop	CG6223	y[1] sc[*] v[1]; P{y[+t7.7] v[+t1.8]=TRiP.HMS01079}attP2	BDSC: 33741
betaCop	CG6223	y[1] v[1]; P{y[+t7.7] v[+t1.8]=TRiP.HM04016}attP2	BDSC: 31709
bib	CG4722	y[1] v[1]; P{y[+t7.7] v[+t1.8]=TRiP.JF02771}attP2	BDSC: 27691
boca	CG30498	y[1] v[1]; P{y[+t7.7] v[+t1.8]=TRiP.JF02863}attP2	BDSC: 28029	Class I
btsz	CG44012	y[1] v[1]; P{y[+t7.7] v[+t1.8]=TRiP.HMS02146}attP40/CyO	BDSC: 40898
cac	CG43368	y[1] v[1]; P{y[+t7.7] v[+t1.8]=TRiP.JF02572}attP2	BDSC: 27244
Cadps	CG33653	y[1] v[1]; P{y[+t7.7] v[+t1.8]=TRiP.JF03418}attP2	BDSC: 31984
caps	CG11282	y[1] v[1]; P{y[+t7.7] v[+t1.8]=TRiP.JF02854}attP2	BDSC: 28020
car	CG12230	y[1] sc[*] v[1]; P{y[+t7.7] v[+t1.8]=TRiP.HMS00972}attP2	BDSC: 34007
CASK	CG6703	y[1] v[1]; P{y[+t7.7] v[+t1.8]=TRiP.JF02710}attP2	BDSC: 27556
CASK	CG6703	y[1] sc[*] v[1]; P{y[+t7.7] v[+t1.8]=TRiP.GL00212}attP2	BDSC: 35309
CASK	CG6703	y[1] sc[*] v[1]; P{y[+t7.7] v[+t1.8]=TRiP.HMS00644}attP2	BDSC: 32857	Class I
Cbs	CG1753	y[1] sc[*] v[1]; P{y[+t7.7] v[+t1.8]=TRiP.HMS03028}attP2	BDSC: 36767
CDase	CG1471	y[1] sc[*] v[1]; P{y[+t7.7] v[+t1.8]=TRiP.HMS03025}attP2/TM3, Sb[1]	BDSC: 36764
CdGAPr	CG10538	y[1] w[*]; P{w[+mC]=UAS-CdGAPr-dsRNA}6.1	BDSC: 6437	Class I					Cytoplasmic Rh1
CdGAPr	CG10538	y[1] sc[*] v[1] sev[21]; P{y[+t7.7] v[+t1.8]=TRiP.HMS01730}attP40	BDSC: 38279	Class I					Cytoplasmic Rh1
CG12107	CG12107	w[1118]; P{GD3759}v8731	VDRC: 8731
CG14691	CG14691	y[1] v[1]; P{y[+t7.7] v[+t1.8]=TRiP.JF03420}attP2	BDSC: 31986
CG15014	CG15014	y[1] sc[*] v[1]; P{y[+t7.7] v[+t1.8]=TRiP.HMS01722}attP40	BDSC: 38273
CG15221	CG15221	y[1] v[1]; P{y[+t7.7] v[+t1.8]=TRiP.JF02166}attP2	BDSC: 31888
CG17528	CG17528	y[1] v[1]; P{y[+t7.7] v[+t1.8]=TRiP.JF02061}attP2	BDSC: 26292
CG31103	CG31103	y[1] v[1]; P{y[+t7.7] v[+t1.8]=TRiP.JF02995}attP2/TM3, Sb[1]	BDSC: 28359
CG31106	CG31106	y[1] v[1]; P{y[+t7.7] v[+t1.8]=TRiP.JF03261}attP2	BDSC: 29582
CG31272	CG31272	y[1] v[1]; P{y[+t7.7] v[+t1.8]=TRiP.JF02865}attP2	BDSC: 28030
CG3168	CG3168	y[1] v[1]; P{y[+t7.7] v[+t1.8]=TRiP.JF02441}attP2	BDSC: 29301
CG32206	CG32206	y[1] v[1]; P{y[+t7.7] v[+t1.8]=TRiP.HMS00046}attP2	BDSC: 33645
CG32758	CG32758	y[1] sc[*] v[1]; P{y[+t7.7] v[+t1.8]=TRiP.HMS01669}attP40	BDSC: 38225
CG3690	CG3690	y[1] v[1]; P{y[+t7.7] v[+t1.8]=TRiP.JF02768}attP2	BDSC:27688
CG5439	CG5439	y[1] sc[*] v[1]; P{y[+t7.7] v[+t1.8]=TRiP.HMS00914}attP2	BDSC: 34093
CG7156	CG7156	y[1] sc[*] v[1]; P{y[+t7.7] v[+t1.8]=TRiP.GL00155}attP2	BDSC: 35263
Chc	CG9012	y[1] v[1]; P{y[+t7.7] v[+t1.8]=TRiP.JF02681}attP2	BDSC: 27530	Class II					Reduced Crb, cytoplasmic Eys and Rh1
Chc	CG9012	w1118; P{GD14095}v23666	VDRC: 23666	Class II					Reduced Crb, cytoplasmic Eys and Rh1
Chmp1	CG4108	y[1] v[1]; P{y[+t7.7] v[+t1.8]=TRiP.HM05117}attP2	BDSC: 28906
Chmp1	CG4108	y[1] sc[*] v[1]; P{y[+t7.7] v[+t1.8]=TRiP.HMS00877}attP2	BDSC: 33928
cindr	CG31012	y[1] sc[*] v[1]; P{y[+t7.7] v[+t1.8]=TRiP.GLV21035}attP2/TM3, Sb[1]	BDSC: 35670
Clc	CG6948	y[1] v[1]; P{y[+t7.7] v[+t1.8]=TRiP.JF02646}attP2	BDSC: 27496
cm	CG3035	y[1] v[1]; P{y[+t7.7] v[+t1.8]=TRiP.JF02594}attP2	BDSC: 27282	Class I
Cog1	CG4848	y[1] sc[*] v[1]; P{y[+t7.7] v[+t1.8]=TRiP.HMS01857}attP40	BDSC: 38943
comm	CG17943	y[1] v[1]; P{y[+t7.7] v[+t1.8]=TRiP.JF03018}attP2/TM3, Sb[1]	BDSC: 28381
comt	CG1618	y[1] sc[*] v[1]; P{y[+t7.7] v[+t1.8]=TRiP.HMS01261}attP2	BDSC: 34913
comt	CG1618	y[1] v[1]; P{y[+t7.7] v[+t1.8]=TRiP.JF01233}attP2	BDSC: 31470
cpx	CG32490	y[1] sc[*] v[1]; P{y[+t7.7] v[+t1.8]=TRiP.HMS02442}attP40	BDSC: 42017
crq	CG4280	y[1] v[1]; P{y[+t7.7] v[+t1.8]=TRiP.HMS01997}attP40	BDSC: 40831	Class I
Csp	CG6395	y[1] v[1]; P{y[+t7.7] v[+t1.8]=TRiP.JF01235}attP2	BDSC: 31290
Csp	CG6395	y[1] v[1]; P{y[+t7.7] v[+t1.8]=TRiP.JF01462}attP2	BDSC: 31669
dap	CG1772	y[1] sc[*] v[1]; P{y[+t7.7] v[+t1.8]=TRiP.HMS01610}attP2	BDSC: 36720
Dap160	CG1099	y[1] v[1]; P{y[+t7.7] v[+t1.8]=TRiP.JF01918}attP2	BDSC: 25879
deltaCOP	CG14813	y[1] v[1]; P{y[+t7.7] v[+t1.8]=TRiP.HM04076}attP2	BDSC: 31764
Dhc64C	CG7507	y[1] sc[*] v[1]; P{y[+t7.7] v[+t1.8]=TRiP.HMS01587}attP2	BDSC: 36698	Class I					Increase in cytoplasmic Rh1, cytoplasmic Eys and decrease in IRS size
Dhc64C	CG7507	y[1] v[1]; P{y[+t7.7] v[+t1.8]=TRiP.JF03177}attP2	BDSC: 28749	Class I					Increase in cytoplasmic Rh1, cytoplasmic Eys and decrease in IRS size
Dhc64C	CG7507	y[1] sc[*] v[1]; P{y[+t7.7] v[+t1.8]=TRiP.GL00543}attP40	BDSC: 36583	Class I					Increase in cytoplasmic Rh1, cytoplasmic Eys and decrease in IRS size
disp	CG2019	y[1] v[1]; P{y[+t7.7] v[+t1.8]=TRiP.JF02550}attP2	BDSC: 27247
Drp1	CG3210	y[1] v[1]; P{y[+t7.7] v[+t1.8]=TRiP.JF02762}attP2	BDSC: 27682
drpr	CG2086	y[1] sc[*] v[1]; P{y[+t7.7] v[+t1.8]=TRiP.HMS01623}attP2	BDSC: 36732
dx	CG3929	y[1] v[1]; P{y[+t7.7] v[+t1.8]=TRiP.JF02367}attP2	BDSC: 27041
EndoA	CG14296	y[1] v[1]; P{y[+t7.7] v[+t1.8]=TRiP.JF02758}attP2	BDSC: 27679
EndoB	CG9834	y[1] sc[*] v[1]; P{y[+t7.7] v[+t1.8]=TRiP.HMS01285}attP2	BDSC: 34935
EndoB	CG9834	y[1] v[1]; P{y[+t7.7] v[+t1.8]=TRiP.JF02688}attP2	BDSC: 27537
Eps-15	CG16932	y[1] v[1]; P{y[+t7.7] v[+t1.8]=TRiP.JF03257}attP2	BDSC: 29578	Class I
Eps-15	CG16932	y[1] sc[*] v[1]; P{y[+t7.7] v[+t1.8]=TRiP.HMS00893}attP2	BDSC:33942
Eps-15	CG16932	y[1] sc[*] v[1]; P{y[+t7.7] v[+t1.8]=TRiP.HMS00947}attP2	BDSC: 33987
epsilonCOP	CG9543	y[1] v[1]; P{y[+t7.7] v[+t1.8]=TRiP.HM05100}attP2	BDSC: 28890
ex	CG4114	y[1] sc[*] v[1]; P{y[+t7.7] v[+t1.8]=TRiP.HMS00874}attP2	BDSC: 34968
ex	CG4114	y[1] v[1]; P{y[+t7.7] v[+t1.8]=TRiP.JF03120}attP2	BDSC: 28703	Class I					Missing some of the rhabdomeres
Exo70	CG7127	y[1] sc[*] v[1] sev[21]; P{y[+t7.7] v[+t1.8]=TRiP.GLC01851}attP2	BDSC: 55234	Class I					Increase in cytoplasmic Rh1, cytoplasmic Eys and decrease in IRS size
Exo70	CG7127	y[1] v[1]; P{y[+t7.7] v[+t1.8]=TRiP.JF02876}attP2/TM3, Sb[1]	BDSC: 28041
Exo84	CG6095	y[1] v[1]; P{y[+t7.7] v[+t1.8]=TRiP.JF03139}attP2	BDSC: 28712	Class I					Increase in cytoplasmic Rh1, cytoplasmic Eys and decrease in IRS size
faf	CG1945	y[1] sc[*] v[1]; P{y[+t7.7] v[+t1.8]=TRiP.HMS01470}attP2/TM3, Sb[1]	BDSC: 35728
Fign	CG3326	y[1] sc[*] v[1]; P{y[+t7.7] v[+t1.8]=TRiP.HMS01711}attP40	BDSC: 38266	Class I
Flo1	CG8200	y[1] sc[*] v[1]; P{y[+t7.7] v[+t1.8]=TRiP.GL00609}attP40	BDSC: 36649
Flo1	CG8200	y[1] sc[*] v[1]; P{y[+t7.7] v[+t1.8]=TRiP.HMS01589}attP2/TM3, Sb[1]	BDSC: 36700
Flo2	CG32593	y[1] v[1]; P{y[+t7.7] v[+t1.8]=TRiP.HMS01999}attP40/CyO	BDSC: 40833	Class I
fz2	CG9739	y[1] v[1]; P{y[+t7.7] v[+t1.8]=TRiP.JF02722}attP2	BDSC: 27568
fz2	CG9739	y[1] v[1]; P{y[+t7.7] v[+t1.8]=TRiP.JF01259}attP2	BDSC: 31312
fz2	CG9739	y[1] v[1]; P{y[+t7.7] v[+t1.8]=TRiP.JF01378}attP2	BDSC: 31390
GABA-B-R2	CG6706	y[1] v[1]; P{y[+t7.7] v[+t1.8]=TRiP.JF02779}attP2	BDSC: 27699
GABPI	CG17257	y[1] v[1]; P{y[+t7.7] v[+t1.8]=TRiP.JF02349}attP2	BDSC: 27028
gammaCop	CG1528	y[1] v[1]; P{y[+t7.7] v[+t1.8]=TRiP.HM05099}attP2	BDSC: 28889
garz	CG8487	y[1] v[1]; P{y[+t7.7] v[+t1.8]=TRiP.JF01603}attP2	BDSC: 31232
garz	CG8487	y[1] sc[*] v[1]; P{y[+t7.7] v[+t1.8]=TRiP.HMS01397}attP2/TM3, Sb[1]	BDSC: 34987
Golgin84	CG17785	y[1] sc[*] v[1]; P{y[+t7.7] v[+t1.8]=TRiP.HMS01959}attP40	BDSC: 39039	Class I
Gos28	CG7700	y[1] sc[*] v[1]; P{y[+t7.7] v[+t1.8]=TRiP.HMS01203}attP2	BDSC: 34724
Hip1	CG10971	y[1] sc[*] v[1]; P{y[+t7.7] v[+t1.8]=TRiP.HMS00508}attP2	BDSC: 32504
Hip14	CG6017	y[1] v[1]; P{y[+t7.7] v[+t1.8]=TRiP.JF01167}attP2	BDSC: 31591
Hip14	CG6017	y[1] sc[*] v[1]; P{y[+t7.7] v[+t1.8]=TRiP.HMS01422}attP2	BDSC: 35012
Hk	CG43388	y[1] v[1]; P{y[+t7.7] v[+t1.8]=TRiP.JF02965}attP2/TM3, Sb[1]	BDSC: 28330
Hrs	CG2903	y[1] sc[*] v[1]; P{y[+t7.7] v[+t1.8]=TRiP.HMS00840}attP2	BDSC: 34086
Hrs	CG2903	y[1] v[1]; P{y[+t7.7] v[+t1.8]=TRiP.JF02860}attP2	BDSC: 28026
jar	CG5695	y[1] v[1]; P{y[+t7.7] v[+t1.8]=TRiP.JF02901}attP2	BDSC: 28064	Class I					Minor defect with rhabdomere shape
kat-60L1	CG1193	y[1] sc[*] v[1]; P{y[+t7.7] v[+t1.8]=TRiP.HMS00510}attP2	BDSC: 32506
Kat60	CG10229	y[1] v[1]; P{y[+t7.7] v[+t1.8]=TRiP.JF03012}attP2	BDSC: 28375
Khc	CG7765	y[1] v[1]; P{y[+t7.7] v[+t1.8]=TRiP.JF01939}attP2	BDSC: 25898	Class I					Cytoplasmic Rh1 and Eys
Khc	CG7765	y[1] sc[*] v[1]; P{y[+t7.7] v[+t1.8]=TRiP.GL00330}attP2	BDSC: 35409	Class I					Cytoplasmic Rh1 and Eys
Khc	CG7765	y[1] sc[*] v[1]; P{y[+t7.7] v[+t1.8]=TRiP.HMS01519}attP2	BDSC: 35770
Klc	CG5433	y[1] sc[*] v[1]; P{y[+t7.7] v[+t1.8]=TRiP.GL00535}attP40	BDSC: 36795	Class I					Cytoplasmic Rh1 and Eys and reduction in Crb levels
Klc	CG5433	y[1] sc[*] v[1] sev[21]; P{y[+t7.7] v[+t1.8]=TRiP.HMS00883}attP2	BDSC: 33934	Class I					Cytoplasmic Rh1 and Eys and reduction in Crb levels
Klc	CG5433	y[1] sc[*] v[1] sev[21]; P{y[+t7.7] v[+t1.8]=TRiP.HMS02429}attP40	BDSC: 42597	Class I					Cytoplasmic Rh1 and Eys and reduction in Crb levels
Klp98A	CG5658	y[1] sc[*] v[1]; P{y[+t7.7] v[+t1.8]=TRiP.HMS01957}attP40	BDSC: 39037
kst	CG12008	y[1] sc[*] v[1]; P{y[+t7.7] v[+t1.8]=TRiP.HMS00882}attP2	BDSC: 33933	Class I
l(2)gd1	CG4713	y[1] v[1]; P{y[+t7.7] v[+t1.8]=TRiP.JF02619}attP2	BDSC: 27311
Lamp1	CG3305	y[1] sc[*] v[1]; P{y[+t7.7] v[+t1.8]=TRiP.GLV21040}attP2	BDSC: 35675
lap	CG2520	y[1] v[1]; P{y[+t7.7] v[+t1.8]=TRiP.JF02994}attP2	BDSC: 28358
LpR1	CG31094	y[1] v[1]; P{y[+t7.7] v[+t1.8]=TRiP.JF02551}attP2	BDSC: 27249
lqf	CG8532	y[1] v[1]; P{y[+t7.7] v[+t1.8]=TRiP.JF02672}attP2	BDSC: 27522
lqf	CG8532	y[1] sc[*] v[1]; P{y[+t7.7] v[+t1.8]=TRiP.GL00527}attP2	BDSC: 36864
lqfR	CG42250	y[1] sc[*] v[1]; P{y[+t7.7] v[+t1.8]=TRiP.HMS01423}attP2	BDSC: 35013
lsn	CG6637	y[1] sc[*] v[1]; P{y[+t7.7] v[+t1.8]=TRiP.HMS01747}attP40	BDSC: 38289
Mer	CG14228	w[1118]; P{GD1484}v7161	VDCR: 7161	Class I
Mer	CG14228	y[1] v[1]; P{y[+t7.7] v[+t1.8]=TRiP.JF02841}attP2/TM3, Sb[1]	BDSC: 28007
Mer	CG14228	y[1] sc[*] v[1]; P{y[+t7.7] v[+t1.8]=TRiP.HMS00459}attP2	BDSC: 34958
mib1	CG5841	y[1] v[1]; P{y[+t7.7] v[+t1.8]=TRiP.JF02629}attP2	BDSC: 27320	Class I
milt	CG43227	y[1] v[1]; P{y[+t7.7] v[+t1.8]=TRiP.JF03022}attP2	BDSC: 28385	Class I
mim	CG33558	y[1] sc[*] v[1]; P{y[+t7.7] v[+t1.8]=TRiP.HMS01690}attP40	BDSC: 38246
mth	CG6936	y[1] v[1]; P{y[+t7.7] v[+t1.8]=TRiP.JF02645}attP2	BDSC: 27495
Myosin V	CG2146	y[1] sc[*] v[1] sev[21]; P{y[+t7.7] v[+t1.8]=TRiP.HMC03900}attP40	BDSC: 55740	Class I					Ectopic rhabdomeres at the basolateral membrane. Basolateral Eys and Crb. Cytoplasmic Rh1 and Eys.
Myosin V	CG2146	w[1118]; P{GD1848}v16902	VDRC: 16902	Class I					Ectopic rhabdomeres at the basolateral membrane. Basolateral Eys and Crb. Cytoplasmic Rh1 and Eys.
Nedd4	CG42279	y[1] v[1]; P{y[+t7.7] v[+t1.8]=TRiP.JF01860}attP2	BDSC: 31687
Nedd4	CG42279	y[1] sc[*] v[1]; P{y[+t7.7] v[+t1.8]=TRiP.HMS01221}attP2	BDSC: 34741
Nrx-IV	CG6827	y[1] sc[*] v[1]; P{y[+t7.7] v[+t1.8]=TRiP.HMS00419}attP2/TM3, Sb[1]	BDSC: 32424
Nrx-IV	CG6827	y[1] v[1]; P{y[+t7.7] v[+t1.8]=TRiP.JF03142}attP2	BDSC: 28715
Nsf2	CG33101	y[1] sc[*] v[1]; P{y[+t7.7] v[+t1.8]=TRiP.HMS01262}attP2	BDSC: 34914	Class I					Rhabdomeres are more rectangular than normal
Nsf2	CG33101	y[1] v[1]; P{y[+t7.7] v[+t1.8]=TRiP.JF02765}attP2	BDSC: 27685
nSyb	CG17248	y[1] v[1]; P{y[+t7.7] v[+t1.8]=TRiP.JF03417}attP2	BDSC: 31983
numb	CG3779	y[1] sc[*] v[1]; P{y[+t7.7] v[+t1.8]=TRiP.HMS01459}attP2	BDSC: 35045
numb	CG3779	y[1] v[1]; P{y[+t7.7] v[+t1.8]=TRiP.JF01695}attP2	BDSC: 31182
Ocrl	CG3573	y[1] sc[*] v[1]; P{y[+t7.7] v[+t1.8]=TRiP.HMS01201}attP2/TM3, Sb[1]	BDSC: 34722
or	CG3029	y[1] v[1]; P{y[+t7.7] v[+t1.8]=TRiP.JF02983}attP2/TM3, Sb[1]	BDSC: 28347
Past1	CG6148	y[1] sc[*] v[1]; P{y[+t7.7] v[+t1.8]=TRiP.HMS00557}attP2	BDSC: 33689
Pi3K59F	CG5373	y[1] sc[*] v[1]; P{y[+t7.7] v[+t1.8]=TRiP.GL00175}attP2/TM3, Sb[1]	BDSC: 36056
Pi3K59F	CG5373	y[1] sc[*] v[1]; P{y[+t7.7] v[+t1.8]=TRiP.HMS00261}attP2/TM3, Sb[1]	BDSC: 33384
PICK1	CG6167	y[1] v[1]; P{y[+t7.7] v[+t1.8]=TRiP.JF01199}attP2	BDSC: 31258
Pld	CG12110	y[1] sc[*] v[1]; P{y[+t7.7] v[+t1.8]=TRiP.HMS00529}attP2	BDSC: 32839
Ppt1	CG12108	y[1] v[1]; P{y[+t7.7] v[+t1.8]=TRiP.JF01972}attP2	BDSC: 25952	Class I
qtc	CG14039	y[1] v[1]; P{y[+t7.7] v[+t1.8]=TRiP.JF03082}attP2	BDSC: 28667
Rab1	CG3320	y[1] v[1]; P{y[+t7.7] v[+t1.8]=TRiP.JF02609}attP2	BDSC: 27299	Class II					Reduction in Crb, Eys and Rh1
Rab1	CG3320	P{VSH330620}attP40	VDRC: 330620	Class II					Reduction in Crb, Eys and Rh1
Rab11	CG5771	P{KK108297}VIE-260B	VDRC: 108382	Class II					Eye is black and necrotic, unable to dissect
Rab11	CG5771	y[1] v[1]; P{y[+t7.7] v[+t1.8]=TRiP.JF02812}attP2	BDSC: 27730	Class II					Eye is black and necrotic, unable to dissect
Rab18	CG3129	y[1] v[1]; P{y[+t7.7] v[+t1.8]=TRiP.JF02744}attP2	BDSC: 27665
Rab19	CG7062	P{KK107774}VIE-260B	VDRC: 103653
Rab2	CG3269	y[1] v[1]; P{y[+t7.7] v[+t1.8]=TRiP.JF03117}attP2	BDSC: 28701	Class I					Missing rhabdomeres and reduced IRS size
Rab2	CG3269	y[1] sc[*] v[1] sev[21]; P{y[+t7.7] v[+t1.8]=TRiP.HMS01271}attP2	BDSC: 34922	Class I					Missing rhabdomeres and reduced IRS size
Rab2	CG3269	w1118; P{GD11158}v34767	VDRC: 34767	Class I					Missing rhabdomeres and reduced IRS size
Rab21	CG17515	w[1118]; P{GD9402}v32941	VDRC: 32941	Class II					Unable to dissect as eyes were too fragile
Rab23	CG2108	y[1] v[1]; P{y[+t7.7] v[+t1.8]=TRiP.JF02859}attP2	BDSC: 28025
Rab30	CG9100	y[1] v[1]; P{y[+t7.7] v[+t1.8]=TRiP.JF01593}attP2	BDSC: 31120
Rab32	CG8024	y[1] v[1]; P{y[+t7.7] v[+t1.8]=TRiP.HMS01870}attP40/CyO	BDSC: 38956
Rab35	CG9575	y[1] v[1]; P{y[+t7.7] v[+t1.8]=TRiP.JF02978}attP2	BDSC: 28342
Rab39	CG12156	w[1118]; P{GD7507}v31666/CyO	VDRC: 31666
Rab40	CG1900	y[1] v[1]; P{y[+t7.7] v[+t1.8]=TRiP.JF03258}attP2	BDSC: 29579
Rab5	CG3664	y[1] v[1]; P{y[+t7.7] v[+t1.8]=TRiP.JF03335}attP2	BDSC: 30518	Class II					Many ommatidia disintegrated; less affected ommatidia had larger IRS, longer Crb stained stalks and degenerated rhabdomeres; reduced Rh1 at the rhabdomeres
Rab5	CG3664	y[1] sc[*] v[1] sev[21]; P{y[+t7.7] v[+t1.8]=TRiP.HMS00147}attP2	BDSC: 34832	Class I					Some ommatidia disintegrated; less affected ommatidia had larger IRS, longer Crb stained stalks and degenerated rhabdomeres; reduced Rh1 at the rhabdomeres
Rab7	CG5915	y[1] v[1]; P{y[+t7.7] v[+t1.8]=TRiP.JF02377}attP2	BDSC: 27051
Rab8	CG8287	y[1] v[1]; P{y[+t7.7] v[+t1.8]=TRiP.JF02669}attP2	BDSC: 27519	Class I
Rab8	CG8287	y[1] sc[*] v[1] sev[21]; P{y[+t7.7] v[+t1.8]=TRiP.HMS01363}attP2	BDSC: 34373
Rabex-5	CG9139	y[1] v[1]; P{y[+t7.7] v[+t1.8]=TRiP.JF02521}attP2/TM3, Sb[1]	BDSC: 29357
RabX5	CG7980	y[1] v[1]; P{y[+t7.7] v[+t1.8]=TRiP.JF02880}attP2	BDSC: 28045
RabX6	CG12015	y[1] v[1]; P{y[+t7.7] v[+t1.8]=TRiP.JF02050}attP2	BDSC: 26281
rb	CG11427	y[1] v[1]; P{y[+t7.7] v[+t1.8]=TRiP.JF03083}attP2	BDSC: 28668
Rho1	CG8416	y[1] v[1]; P{y[+t7.7] v[+t1.8]=TRiP.JF02809}attP2	BDSC: 27727	Class I
Rim	CG33547	y[1] v[1]; P{y[+t7.7] v[+t1.8]=TRiP.JF02610}attP2	BDSC: 27300	Class I
Rok	CG9774	y[1] v[1]; P{y[+t7.7] v[+t1.8]=TRiP.JF03225}attP2	BDSC: 28797
Rop	CG15811	y[1] v[1]; P{y[+t7.7] v[+t1.8]=TRiP.HM05140}attP2	BDSC: 28929
Rph	CG11556	y[1] v[1]; P{y[+t7.7] v[+t1.8]=TRiP.JF01970}attP2	BDSC: 25950	Class I					Larger IRS, longer Crb stained membrane, rectangular rhabdomeres
Rph	CG11556	w1118; P{GD7330}v52438	VDRC: 52438	Class I					Larger IRS, longer Crb stained membrane, rectangular rhabdomeres (weaker than 25950)
Rph	CG11556	P{KK107492}VIE-260B	VDRC: 109337
Sar1	CG7073	y[1] sc[*] v[1]; P{y[+t7.7] v[+t1.8]=TRiP.HMS00355}attP2/TM3, Sb[1]	BDSC: 32364
Scamp	CG9195	y[1] sc[*] v[1]; P{y[+t7.7] v[+t1.8]=TRiP.HMS01728}attP40	BDSC: 38277
SCAP	CG33131	y[1] v[1]; P{y[+t7.7] v[+t1.8]=TRiP.JF01139}attP2	BDSC: 31566
scat	CG3766	y[1] v[1]; P{y[+t7.7] v[+t1.8]=TRiP.HMS01910}attP40	BDSC: 38994
Sec10	CG6159	y[1] v[1]; P{y[+t7.7] v[+t1.8]=TRiP.JF02633}attP2	BDSC: 27483	Class I					Increase in cytoplasmic Rh1, cytoplasmic Eys and decrease in IRS size
Sec13	CG6773	y[1] sc[*] v[1]; P{y[+t7.7] v[+t1.8]=TRiP.HMS00468}attP2	BDSC: 32468
Sec15	CG7034	y[1] v[1]; P{y[+t7.7] v[+t1.8]=TRiP.JF02649}attP2	BDSC: 27499	Class I					Increase in cytoplasmic Rh1, cytoplasmic Eys and decrease in IRS size
Sec22	CG7359	y[1] sc[*] v[1]; P{y[+t7.7] v[+t1.8]=TRiP.HMS01238}attP2	BDSC: 34893
Sec5	CG8843	y[1] v[1]; P{y[+t7.7] v[+t1.8]=TRiP.JF02676}attP2	BDSC: 27526	Class I					Increase in cytoplasmic Rh1, cytoplasmic Eys and decrease in IRS size
Sec6	CG5341	P{KK102544}VIE-260B	VDRC: 105836	Class I					Increase in cytoplasmic Rh1, cytoplasmic Eys and decrease in IRS size
Sec6	CG5341	y[1] v[1]; P{y[+t7.7] v[+t1.8]=TRiP.JF02623}attP2	BDSC: 27314
Sec6	CG5341	w[1118]; P{GD11616}v22079	VDRC: 22079	Class I					Increase in cytoplasmic Rh1, cytoplasmic Eys and decrease in IRS size
Sec71	CG7578	P{KK107637}VIE-260B	VDRC: 100300	Class II					Significant reduction in Crb, Eys and Rh1, rhabdomeres absent
Sec71	CG7578	y[1] sc[*] v[1]; P{y[+t7.7] v[+t1.8]=TRiP.HMS00357}attP2/TM3, Sb[1]	BDSC: 32366	Class II					Significant reduction in Crb, Eys and Rh1, rhabdomeres absent
sfl	CG8339	y[1] sc[*] v[1]; P{y[+t7.7] v[+t1.8]=TRiP.HMS00543}attP2	BDSC: 34601
SH3PX1	CG6757	y[1] v[1]; P{y[+t7.7] v[+t1.8]=TRiP.JF02730}attP2/TM3, Sb[1]	BDSC: 27653
Shark	CG18247	y[1] v[1]; P{y[+t7.7] v[+t1.8]=TRiP.HMJ02128}attP40	BDSC: 42555
shi	CG18102	y[1] sc[*] v[1]; P{y[+t7.7] v[+t1.8]=TRiP.HMS00154}attP2	BDSC: 36921	Class II					Cytoplasmic Eys, Crb, and Rh1 and retinal degeneration
shi	CG18102	y[1] v[1]; P{y[+t7.7] v[+t1.8]=TRiP.JF03133}attP2	BDSC: 28513	Class II					Cytoplasmic Eys, Crb, and Rh1 and retinal degeneration
shrb	CG8055	y[1] v[1]; P{y[+t7.7] v[+t1.8]=TRiP.HMS01767}attP40	BDSC: 38305	Class I					Cytoplasmic Eys, Crb, and Rh1 and retinal degeneration
shrb	CG8055	P{KK108557}VIE-260B	VDRC: 106823	Class I					Cytoplasmic Eys, Crb, and Rh1 and retinal degeneration
Slh	CG3539	y[1] sc[*] v[1]; P{y[+t7.7] v[+t1.8]=TRiP.HMS01323}attP2/TM3, Sb[1]	BDSC: 34335	Class I					Reduction of Rh1, Eys and Crb
Slh	CG3539	y[1] v[1]; P{y[+t7.7] v[+t1.8]=TRiP.HMJ21035}attP40/CyO	BDSC: 50940	Class I					Reduction of Rh1, Eys and Crb
Snap24	CG9474	y[1] v[1]; P{y[+t7.7] v[+t1.8]=TRiP.JF03146}attP2	BDSC: 28719
Snap25	CG40452	y[1] v[1]; P{y[+t7.7] v[+t1.8]=TRiP.JF02615}attP2	BDSC: 27306
Snap25	CG40452	y[1] sc[*] v[1]; P{y[+t7.7] v[+t1.8]=TRiP.HMS01367}attP2	BDSC: 34377
Snap29	CG11173	y[1] v[1]; P{y[+t7.7] v[+t1.8]=TRiP.JF01883}attP2	BDSC: 25862
Snapin	CG9958	y[1] v[1]; P{y[+t7.7] v[+t1.8]=TRiP.JF02692}attP2	BDSC: 27541
Snx1	CG2774	y[1] sc[*] v[1]; P{y[+t7.7] v[+t1.8]=TRiP.HMS01763}attP40	BDSC: 38301
Snx16	CG6410	y[1] sc[*] v[1]; P{y[+t7.7] v[+t1.8]=TRiP.HMS01908}attP40	BDSC: 38992
Snx3	CG6359	y[1] sc[*] v[1]; P{y[+t7.7] v[+t1.8]=TRiP.HMS02344}attP	BDSC: 41947
Snx6	CG8282	y[1] sc[*] v[1]; P{y[+t7.7] v[+t1.8]=TRiP.HMS01729}attP40	BDSC: 38278	Class I
snz	CG1514	y[1] sc[*] v[1]; P{y[+t7.7] v[+t1.8]=TRiP.HMS01956}attP40	BDSC: 39036
spin	CG8428	y[1] v[1]; P{y[+t7.7] v[+t1.8]=TRiP.JF02782}attP2	BDSC: 27702
sqh	CG3595	y[1] sc[*] v[1]; P{y[+t7.7] v[+t1.8]=TRiP.HMS00830}attP2	BDSC: 33892	Class II					Larger IRS, longer Crb stained membrane, rectangular rhabdomeres for some ommatidia
sqh	CG3595	y[1] sc[*] v[1]; P{y[+t7.7] v[+t1.8]=TRiP.HMS00437}attP2	BDSC: 32439	Class II					Larger IRS, longer Crb stained membrane, rectangular rhabdomeres for some ommatidia
Src42A	CG44128	y[1] sc[*] v[1]; P{y[+t7.7] v[+t1.8]=TRiP.HMS02755}attP40	BDSC: 44039
Stam	CG6521	y[1] v[1]; P{y[+t7.7] v[+t1.8]=TRiP.JF02637}attP2	BDSC: 27487	Class I
Stam	CG6521	y[1] sc[*] v[1]; P{y[+t7.7] v[+t1.8]=TRiP.HMS01429}attP2	BDSC: 35016
stmA	CG8739	y[1] sc[*] v[1]; P{y[+t7.7] v[+t1.8]=TRiP.HMS01982}attP40	BDSC: 39062	Class I
Syb	CG12210	y[1] sc[*] v[1]; P{y[+t7.7] v[+t1.8]=TRiP.HMS01987}attP40/CyO	BDSC: 39067
Syb	CG12210	y[1] sc[*] v[1]; P{y[+t7.7] v[+t1.8]=TRiP.HMS01678}attP2/TM3, Sb[1]	BDSC: 38234
Syn	CG3985	y[1] v[1]; P{y[+t7.7] v[+t1.8]=TRiP.JF02613}attP2	BDSC: 27304
Synd	CG33094	y[1] v[1]; P{y[+t7.7] v[+t1.8]=TRiP.JF02607}attP2/TM3, Sb[1]	BDSC: 27297
Syngr	CG10808	y[1] sc[*] v[1]; P{y[+t7.7] v[+t1.8]=TRiP.HMS01724}attP40	BDSC: 38274
Synj	CG6562	y[1] sc[*] v[1]; P{y[+t7.7] v[+t1.8]=TRiP.HMS01368}attP2	BDSC: 34378
Synj	CG6562	y[1] v[1]; P{y[+t7.7] v[+t1.8]=TRiP.JF02639}attP2	BDSC: 27489	Class I					Some of the rhabdomeres were missing
Syt1	CG3139	y[1] v[1]; P{y[+t7.7] v[+t1.8]=TRiP.JF01234}attP2	BDSC: 31289
Syt1	CG3139	y[1] v[1]; P{y[+t7.7] v[+t1.8]=TRiP.JF01461}attP2	BDSC: 31668
Syt12	CG10617	y[1] v[1]; P{y[+t7.7] v[+t1.8]=TRiP.JF03128}attP2	BDSC: 28508
Syt14	CG9778	y[1] v[1]; P{y[+t7.7] v[+t1.8]=TRiP.JF03001}attP2/TM3, Sb[1]	BDSC: 28365
Syt4	CG10047	y[1] v[1]; P{y[+t7.7] v[+t1.8]=TRiP.JF02272}attP2/TM3, Sb[1]	BDSC: 26730
Syt7	CG2381	y[1] v[1]; P{y[+t7.7] v[+t1.8]=TRiP.JF02590}attP2	BDSC: 27279	Class I
Sytalpha	CG5559	y[1] v[1]; P{y[+t7.7] v[+t1.8]=TRiP.JF02448}attP2	BDSC: 29308
Sytbeta	CG42333	y[1] v[1]; P{y[+t7.7] v[+t1.8]=TRiP.JF02593}attP2	BDSC: 27293
Syx13	CG11278	y[1] v[1]; P{y[+t7.7] v[+t1.8]=TRiP.JF01920}attP2	BDSC: 27984	Class I
Syx16	CG1467	y[1] v[1]; P{y[+t7.7] v[+t1.8]=TRiP.JF01924}attP2	BDSC: 25884
Syx17	CG7452	y[1] v[1]; P{y[+t7.7] v[+t1.8]=TRiP.JF01937}attP2	BDSC: 25896
Syx18	CG13626	y[1] v[1]; P{y[+t7.7] v[+t1.8]=TRiP.JF02263}attP2	BDSC: 26721
Syx1A	CG31136	y[1] v[1]; P{y[+t7.7] v[+t1.8]=TRiP.JF01829}attP2	BDSC: 25811
Syx4	CG2715	y[1] v[1]; P{y[+t7.7] v[+t1.8]=TRiP.JF01714}attP2	BDSC: 31198	Class I
Syx4	CG2715	y[1] v[1]; P{y[+t7.7] v[+t1.8]=TRiP.JF01460}attP2	BDSC: 31667
Syx5	CG4214	y[1] v[1]; P{y[+t7.7] v[+t1.8]=TRiP.JF03330}attP2	BDSC: 29397
Syx6	CG7736	y[1] v[1]; P{y[+t7.7] v[+t1.8]=TRiP.JF03125}attP2/TM3, Sb[1]	BDSC: 28505
Syx7/avl	CG5081	y[1] v[1]; P{y[+t7.7] v[+t1.8]=TRiP.JF02436}attP2	BDSC: 29546	Class I					Larger IRS, basolateral Rh1, longer Crb stained stalks
Syx7/avl	CG5081	P{KK101990}VIE-260B	VDRC: 107264	Class I					Larger IRS, basolateral Rh1, longer Crb stained stalks
Syx8	CG4109	y[1] v[1]; P{y[+t7.7] v[+t1.8]=TRiP.JF02038}attP2/TM3, Sb[1]	BDSC: 26013
Tomosyn	CG17762	y[1] v[1]; P{y[+t7.7] v[+t1.8]=TRiP.JF03414}attP2	BDSC: 31980
Tor	CG5092	y[1] sc[*] v[1]; P{y[+t7.7] v[+t1.8]=TRiP.GL00156}attP2	BDSC: 35578
tral	CG10686	y[1] v[1]; P{y[+t7.7] v[+t1.8]=TRiP.HM05028}attP2	BDSC: 28542
Trs23	CG9298	y[1] v[1]; P{y[+t7.7] v[+t1.8]=TRiP.HMS01765}attP40	BDSC: 38303
TSG101	CG9712	y[1] sc[*] v[1]; P{y[+t7.7] v[+t1.8]=TRiP.GLV21075}attP2	BDSC: 35710	Class I					Cytoplasmic Rh1, smaller/missing rhabdomeres, smaller IRS and less Crb
TSG101	CG9712	w1118; P{GD14295}v23944/CyO	VDRC: 23944	Class I					Cytoplasmic Rh1, smaller/missing rhabdomeres, smaller IRS and less Crb
TSG101	CG9712	y[1] sc[*] v[1] sev[21]; P{y[+t7.7] v[+t1.8]=TRiP.HMS01768}attP40	BDSC: 38306
twf	CG3172	y[1] sc[*] v[1]; P{y[+t7.7] v[+t1.8]=TRiP.GL00278}attP2	BDSC: 35365	Class I					Cytoplasmic Rh1
twf	CG3172	y[1] sc[*] v[1] sev[21]; P{y[+t7.7] v[+t1.8]=TRiP.HMC04627}attP40	BDSC: 57375	Class I					Cytoplasmic Rh1 (mild)
twf	CG3172	w1118; P{GD10342}v25817	VDRC: 25817	Class I					Cytoplasmic Rh1
unc-104	CG8566	y[1] v[1]; P{y[+t7.7] v[+t1.8]=TRiP.HM05162}attP2	BDCS: 28951
unc-13	CG2999	y[1] v[1]; P{y[+t7.7] v[+t1.8]=TRiP.JF02440}attP2	BDSC: 29548
Vamp7	CG1599	y[1] sc[*] v[1]; P{y[+t7.7] v[+t1.8]=TRiP.HMS01762}attP40	BDSC: 38300
Vap33	CG5014	y[1] v[1]; P{y[+t7.7] v[+t1.8]=TRiP.JF02621}attP2	BDSC: 27312
Vha100-1	CG1709	y[1] v[1]; P{y[+t7.7] v[+t1.8]=TRiP.JF02059}attP	BDSC: 26290	Class I					Cytoplasmic accumulation of Rh1, Crb and Eys
Vha13	CG6213	y[1] sc[*] v[1]; P{y[+t7.7] v[+t1.8]=TRiP.HMS01677}attP40	BDSC: 38233
Vha26	CG1088	y[1] sc[*] v[1]; P{y[+t7.7] v[+t1.8]=TRiP.HMS01912}attP2/TM3, Sb[1]	BDSC: 38996	Class I					Cytoplasmic accumulation of Rh1, Crb and Eys
Vha44	CG8048	y[1] sc[*] v[1]; P{y[+t7.7] v[+t1.8]=TRiP.HMS00821}attP2	BDSC: 33884
Vha68-2	CG3762	y[1] sc[*] v[1]; P{y[+t7.7] v[+t1.8]=TRiP.HMS01056}attP2	BDSC: 34582
VhaSFD	CG17332	y[1] sc[*] v[1]; P{y[+t7.7] v[+t1.8]=TRiP.HMS02144}attP40	BDSC: 40896
Vps15	CG9746	y[1] sc[*] v[1]; P{y[+t7.7] v[+t1.8]=TRiP.GL00085}attP2	BDSC: 35209
Vps15	CG9746	y[1] sc[*] v[1]; P{y[+t7.7] v[+t1.8]=TRiP.HMS00908}attP2	BDSC: 34092
Vps16A	CG8454	y[1] sc[*] v[1]; P{y[+t7.7] v[+t1.8]=TRiP.HMS01716}attP40	BDSC: 38271
Vps16B	CG18112	y[1] sc[*] v[1]; P{y[+t7.7] v[+t1.8]=TRiP.HMS01732}attP40	BDSC: 38527	Class I
Vps2	CG14542	y[1] sc[*] v[1]; P{y[+t7.7] v[+t1.8]=TRiP.HMS01911}attP40	BDSC: 38995
Vps20	CG4071	y[1] v[1]; P{y[+t7.7] v[+t1.8]=TRiP.HMS02142}attP40	BDSC: 40894	Class I
Vps24	CG9779	y[1] sc[*] v[1]; P{y[+t7.7] v[+t1.8]=TRiP.HMS01733}attP40	BDSC: 38281
Vps25	CG14750	y[1] v[1]; P{y[+t7.7] v[+t1.8]=TRiP.JF02055}attP2	BDSC: 26286	Class I
Vps26	CG14804	y[1] v[1]; P{y[+t7.7] v[+t1.8]=TRiP.HMS01769}attP40	BDSC: 38937
Vps29	CG4764	y[1] sc[*] v[1]; P{y[+t7.7] v[+t1.8]=TRiP.HMS01877}attP40	BDSC: 38963	Class I
Vps35	CG5625	y[1] sc[*] v[1]; P{y[+t7.7] v[+t1.8]=TRiP.HMS01858}attP40	BDSC: 38944
Vps36	CG10711	y[1] sc[*] v[1]; P{y[+t7.7] v[+t1.8]=TRiP.HMS01739}attP40	BDSC: 38286
Vps37B	CG1115	y[1] sc[*] v[1]; P{y[+t7.7] v[+t1.8]=TRiP.HMS02724}attP40	BDSC: 44010	Class I
Vps4	CG6842	y[1] v[1]; P{y[+t7.7] v[+t1.8]=TRiP.HM04061}attP2	BDSC: 31751
Vps45	CG8228	y[1] sc[*] v[1]; P{y[+t7.7] v[+t1.8]=TRiP.HMS01696}attP40	BDSC: 38252
Vps51	CG15087	y[1] sc[*] v[1]; P{y[+t7.7] v[+t1.8]=TRiP.HMS01731}attP40	BDSC: 38280	Class I
Vps52	CG7371	y[1] sc[*] v[1]; P{y[+t7.7] v[+t1.8]=TRiP.HMS01713}attP40	BDSC: 38268
Vsp37A	CG17828	y[1] sc[*] v[1]; P{y[+t7.7] v[+t1.8]=TRiP.HMS01766}attP40	BDSC: 38304
Vti1a	CG3279	y[1] sc[*] v[1]; P{y[+t7.7] v[+t1.8]=TRiP.HMS01727}attP40	BDSC: 38526
wah	CG4699	w[*]; P{w[+mC]=NIG.4699R}3	BDSC: 32561
X11L	CG5675	y[1] v[1]; P{y[+t7.7] v[+t1.8]=TRiP.JF02449}attP2	BDSC: 29309
Ykt6	CG1515	y[1] sc[*] v[1]; P{y[+t7.7] v[+t1.8]=TRiP.HMS01778}attP40	BDSC: 38314
zip	CG15792	y[1] sc[*] v[1]; P{y[+t7.7] v[+t1.8]=TRiP.HMS01703}attP40/CyO	BDSC: 38259
zip	CG15792	y[1] sc[*] v[1]; P{y[+t7.7] v[+t1.8]=TRiP.HMS01618}attP2	BDSC: 36727	Class I					Rectangular and broken rhabdomeres
