# Supplementary material
Source: publisher figshare collection journal article supplement (https://gsajournals.figshare.com/articles/dataset/_/10010408)
Supplement: Supplementary file 2 [file 2]

## Laffafian and Tepass, Figure S1

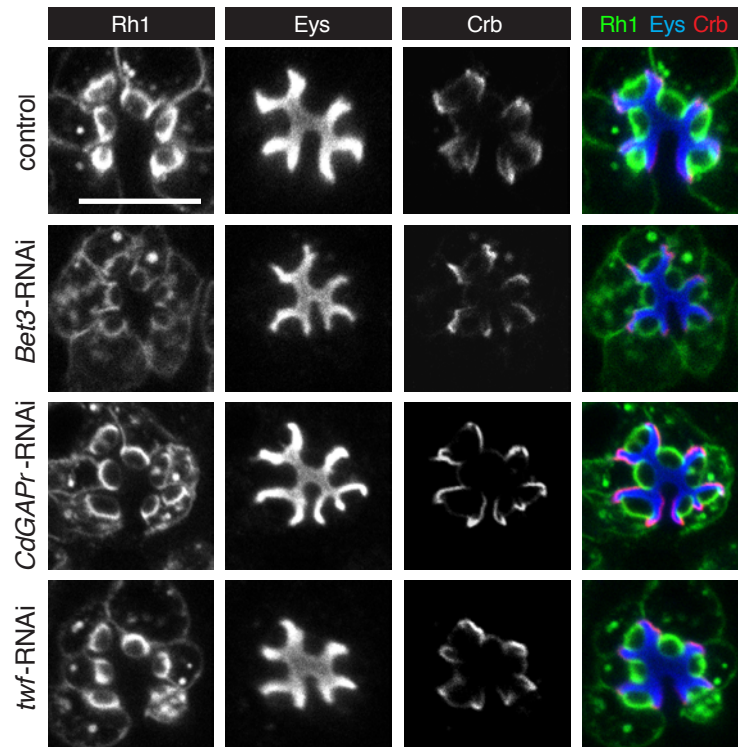

### Figure S1. Genes affecting Rh1 trafficking.

Flies with UAS-RNAi constructs were crossed to UAS-dicer-2; pGMR-Gal4 flies. The retinas of adult progeny were stained for Rh1, Eys, and Crb. UAS-dicer-2/+; pGMR-Gal4/+ was used as a control. **Bet3** knockdown (RNAi line BDSC 38302) resulted in the accumulation of cytoplasmic Rh1. Lower than normal levels of Rh1 were observed in rhabdomeres. **CdGapr** knockdown (RNAi line BDSC 6437) resulted in higher than normal cytoplasmic Rh1. **Twf** knockdown (RNAi line BDSC 35365) led to higher than normal cytoplasmic Rh1 in some of the PRCs. Scale bar, 5  $\mu$ m.
