# Supplementary material
Source: publisher figshare collection journal article supplement (https://gsajournals.figshare.com/articles/dataset/_/10010408)
Supplement: Supplementary file 4 [file 2]

# Laffafian and Tepass, Figure S4

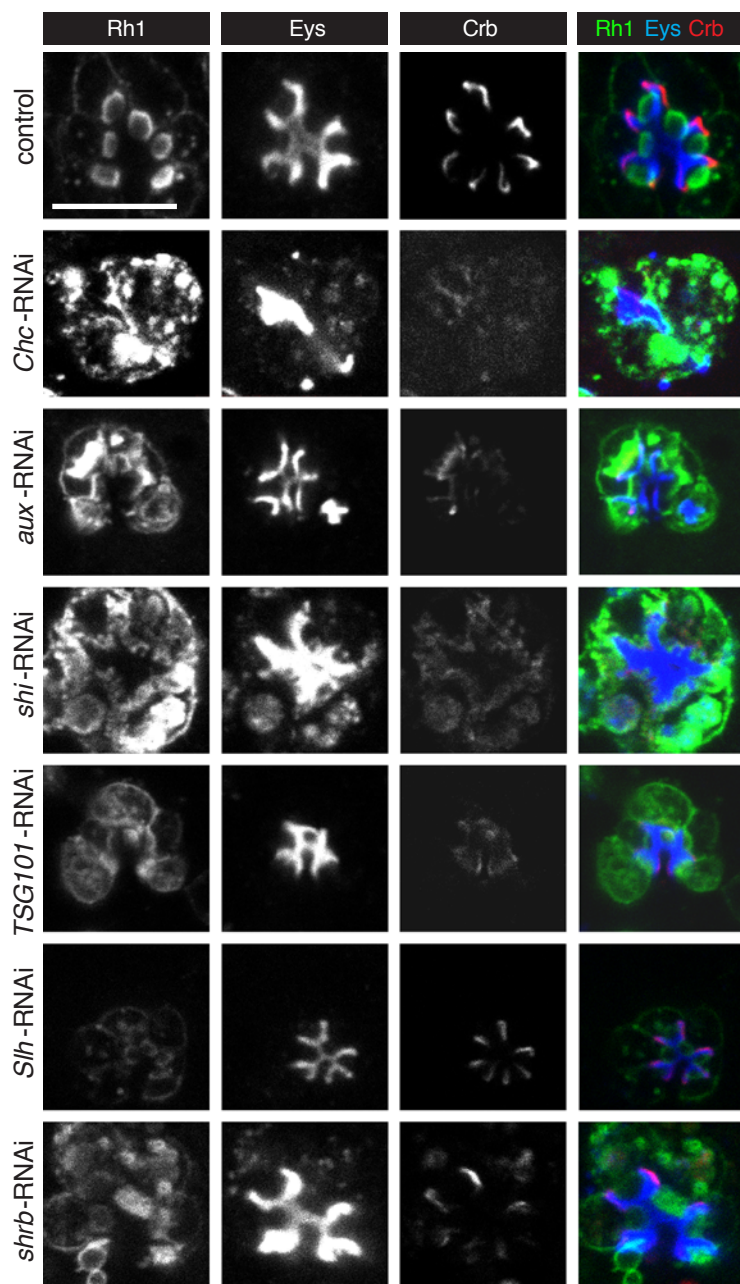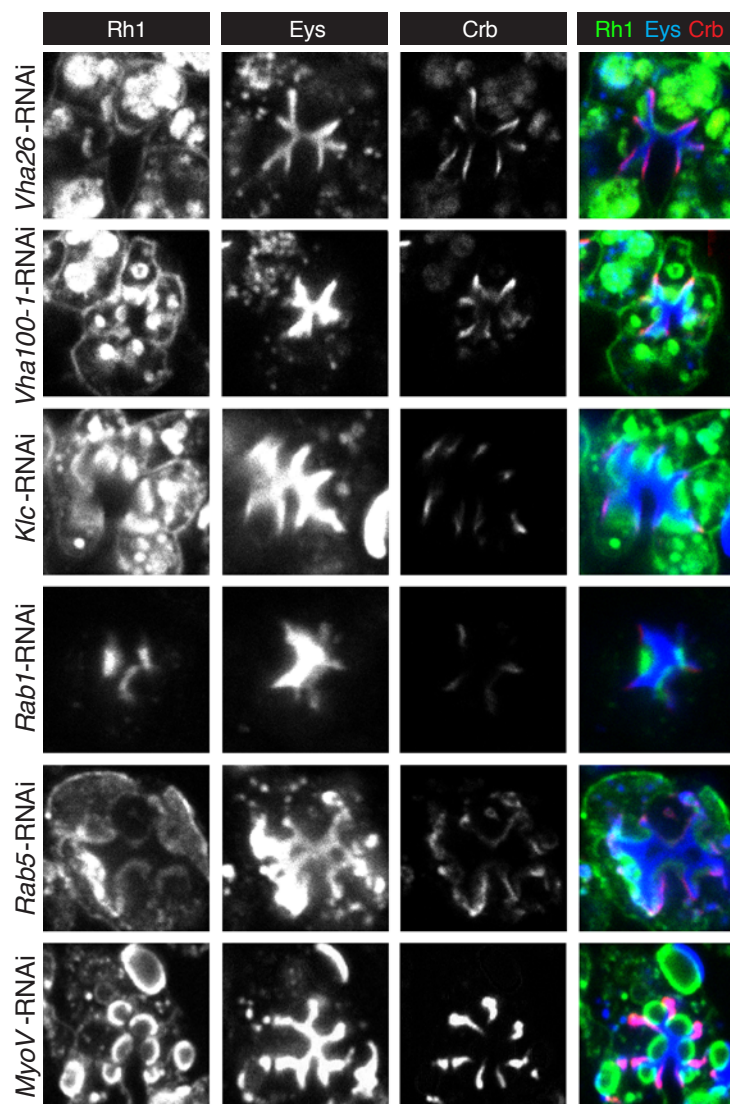

**Figure S4. Genes affecting Rh1, Crb and Eys trafficking.**

Flies with UAS-RNAi constructs were crossed to UAS-dicer-2; pGMR-Gal4 flies. The retinas of adult progeny were stained for Rh1, Eys, and Crb. UAS-dicer-2/+; pGMR-Gal4/+ was used as a control. **Chc** knockdown (RNAi line BDSC 27530) causes PRC breakdown. Cytoplasmic Rh1 and Eys are observed. A strong reduction in Crb was also apparent. **Aux** knockdown (RNAi line BDSC 35310) led to cytoplasmic Rh1 and Eys, in addition to a decrease in Crb levels. The IRS appears smaller. **Shi** knockdown (RNAi line BDSC 36921) led to cytoplasmic Rh1, Eys, and Crb. **Tsg101** knockdown (RNAi line BDSC 35710) led to smaller rhabdomeres, IRS, and stalk. Cytoplasmic Rh1 was observed. **Slh** knockdown (RNAi line BDSC 34335) led to a strong reduction in Rh1, Eys, and Crb, as well as smaller rhabdomeres, IRS and stalk membrane. **Shrb** knockdown (RNAi line BDSC 38305) led to cytoplasmic Rh1, Eys, and Crb. **Vha26** knockdown (RNAi line BDSC 38996) led to cytoplasmic Rh1, Eys, and Crb. IRS appeared smaller.

**Vha100** knockdown (RNAi line BDSC 26290) led to cytoplasmic Rh1, Eys, and Crb. The IRS appeared smaller. **Klc** knockdown (RNAi line BDSC 36795) led to cytoplasmic Rh1 and Eys in addition to a reduction in Crb. **Rab1** knockdown led to the reduction of Rh1, Eys, and Crb. **Rab5** knockdown (RNAi line BDSC 27299) caused an expansion of the IRS, and the length of the stalk. Rhabdomeres are missing. **MyosinV** knockdown (RNAi line BDSC 55740) led to the cytoplasmic accumulation of Rh1 and Eys. Scale bar, 5  $\mu$ m.
